# Supplementary material for: Attentional Bias Modification With Serious Game Elements: Evaluating the Shots Game
Source: PubMed Central journal article supplement (PMC5174726; doi:10.2196/games.6464), 2016-12-06
Supplement: games_v4i2e20_app1.pdf [file games_v4i2e20_app1.pdf]

## Multimedia Appendix 1 – Motivational Questions

| Item    | Dutch (original)                                                                                                                                                                        | English (translation)                                                                                                                                           |
|---------|-----------------------------------------------------------------------------------------------------------------------------------------------------------------------------------------|-----------------------------------------------------------------------------------------------------------------------------------------------------------------|
| MTQ 1   | Ik ben gemotiveerd om aan deze training mee te gaan doen.                                                                                                                               | I am motivated to participate in this training.                                                                                                                 |
| MTQ 2   | Ik geloof dat deze training mij kan helpen om meer controle te krijgen over mijn drinkgedrag.                                                                                           | I believe that this training can help me to get more control over my drinking behavior.                                                                         |
| MTQ 3   | Ik wil graag mijn best doen op de training.                                                                                                                                             | I want to do my best on the training.                                                                                                                           |
| MTQ 4   | Ik vind de training zonde van mijn tijd.                                                                                                                                                | I think the training is a waste of my time.                                                                                                                     |
| RCQSA 1 | Denk je dat je meer drinkt dan goed voor je is?                                                                                                                                         | Do you think that you drink more than is good for you?                                                                                                          |
| RCQSA 2 | Ben je van plan minder te gaan drinken?                                                                                                                                                 | Are you planning to drink less?                                                                                                                                 |
| RCQSA 3 | Ben je in de afgelopen drie maanden veranderd wat betreft je drinken?<br>Ik denk dat deze training mensen in het algemeen kan helpen om meer controle te krijgen over hun drankgebruik. | Did you change your drinking behavior during the past 3 months?<br>I think this training can help people in general to get more control over their alcohol use. |
| EVAL 1  | Ik vond het leuk om deel te nemen aan dit onderzoek.                                                                                                                                    | I liked participating in this study.                                                                                                                            |
| EVAL 2  | Ik zou deze training aanraden aan een vriend/vriendin met een soortgelijk drinkgedrag.                                                                                                  | I would recommend this training to a friend who has a similar drinking behavior.                                                                                |
| EVAL 3  | Ik zou graag nog meer trainingssessies willen doen.                                                                                                                                     | I would like to do more training sessions.                                                                                                                      |
| EVAL 4  | Ik vond 4 trainingssessies te veel.                                                                                                                                                     | I thought 4 training sessions were too many.                                                                                                                    |
| EVAL 5  | De vormgeving van de training motiveerde me om echt mijn best te doen.                                                                                                                  | The environment of the training motivated me to really do my best.                                                                                              |
| EVAL 6  |                                                                                                                                                                                         |                                                                                                                                                                 |
